# Supplementary material
Source: Springer Nature journal article supplement (https://www.springermedizin.de/resource/supplementary/12885_2013_4216_MOESM2_ESM.pdf/9465852)

**A.**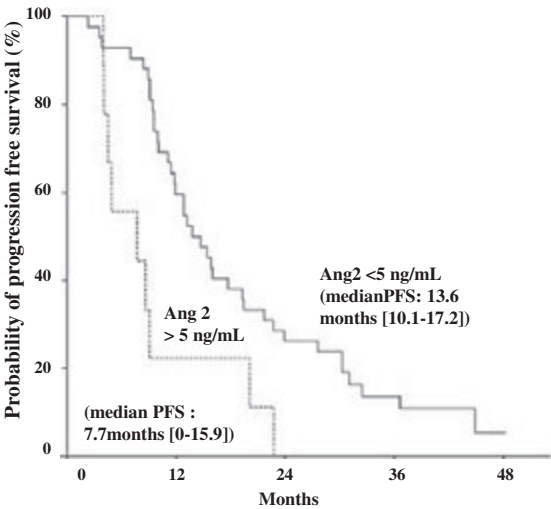**B.**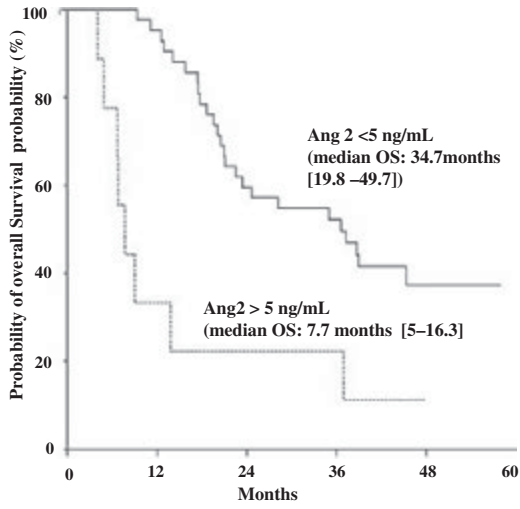

Supplement: MOESM2 [file 9465852]
